# Supplementary material for: Relationship between corrosion and nanoscale friction on a metallic glass
Source: publisher site journal article supplement (doi:10.3762/bjnano.13.18), 2022-02-18
Supplement: Additional file 1 [file 2190-4286-13-18-S1.pdf]

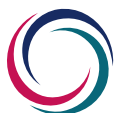

## Supporting Information

for

### Relationship between corrosion and nanoscale friction on a metallic glass

Haoran Ma and Roland Bennewitz

*Beilstein J. Nanotechnol.* **2022**, *13*, 236–244. [doi:10.3762/bjnano.13.18](https://doi.org/10.3762/bjnano.13.18)

### Repetitive scans with increasing normal loads

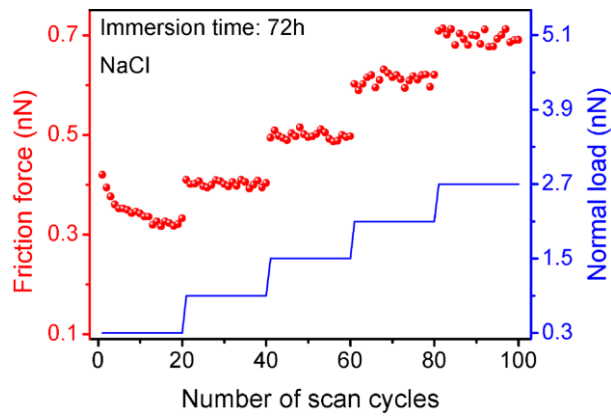

**Figure S1:** Friction force as a function of number of scan cycles on  $Zr_{63}Ni_{22}Ti_{15}$  metallic glass after immersion into 0.2 M NaCl solution for 72 h, with stepwise increasing the normal load.
